# **The role of the pre-commissural fornix in episodic autobiographical memory and simulation**

**Abbreviated title:** Pre-commissural fornix in past and future thinking

Angharad N. Williams<sup>1\*</sup>, Samuel Ridgeway<sup>1</sup>, Mark Postans<sup>1</sup>, Kim S. Graham<sup>1+</sup>,  
Andrew, D. Lawrence<sup>1+</sup> & Carl J. Hodgetts<sup>1+</sup>

1. Cardiff University Brain Research Imaging Centre (CUBRIC), School of Psychology, Cardiff University, Maindy Road, Cardiff, CF24 4HQ, United Kingdom

\* Corresponding author: Dr. Angharad Nia Williams, Cardiff University Brain Research Imaging Centre (CUBRIC), School of Psychology, Cardiff University, Maindy Road, Cardiff, CF24 4HQ, United Kingdom. E-mail: [williamsan@cardiff.ac.uk](mailto:williamsan@cardiff.ac.uk)

<sup>+</sup> Joint senior authors

# **Abstract**

The ability to vividly remember the past, and imagine the future, involves two key regions: the hippocampus and ventromedial prefrontal cortex (vmPFC). Despite evidence of a direct anatomical connection between these structures, it is unknown whether hippocampal-vmPFC structural connectivity supports both past and future-oriented episodic thinking. We applied diffusion-weighted magnetic resonance imaging (dMRI) and a novel tractography protocol to reconstruct distinct fornix subdivisions previously detected in axonal tracer studies, namely pre-commissural (connecting anterior hippocampus to vmPFC) and post-commissural (linking posterior hippocampus and medial diencephalon) fornix, in a group of healthy humans who undertook a past-future autobiographical interview. Inter-individual differences in pre- but not post-commissural fornix microstructure significantly correlated with the episodic richness of both past *and* future autobiographical narratives. These results remained significant when controlling for both non-episodic narrative content and regional volumes. Reconstructing events from one's past, and constructing possible future events, thus involves a distinct, structurally-instantiated hippocampal-vmPFC pathway.

## **Keywords:**

Hippocampus, Episodic memory, Future thinking, Structural connectivity, vmPFC, White matter tractography

## Significance Statement

A novel anatomically-guided protocol that allows the pre-commissural and post-commissural fornix fibers to be separately reconstructed *in vivo* (Christiansen et al., 2016) was applied to reconstruct the pre-commissural subdivision of the white matter fornix tract (anatomically linking the hippocampal formation to the vmPFC) and investigate its contribution to episodic memory and future simulation. We demonstrated that the amount of episodic details contained in past and future narratives, collected via an adapted autobiographical interview, was positively correlated with pre-, but not post-, commissural fornix microstructure. These findings highlight how inter-individual variation in the pre-commissural subdivision of the fornix underpins the construction of self-reflective, contextual events – for both the past and future.

## Introduction

A key adaptive feature of human cognition is the ability to re-experience our personal histories and imagine the future in vivid detail. According to the constructive episodic simulation hypothesis, the processes and neural machinery that allow us to remember past experiences also allow us to imagine future experiences (Addis, 2018; Schacter et al., 2012). Consistent with this view, remembering past and imagining future events activate a common set of brain regions, including the hippocampus and ventromedial prefrontal cortex (vmPFC) (Addis, Wong, & Schacter, 2007; Benoit & Schacter, 2015). Furthermore, the ability to retrieve episodically rich autobiographical memories and construct coherent future simulations is diminished following lesions to both the hippocampus and vmPFC (McCormick, Ciaramelli, De Luca, & Maguire, 2018; Race, Keane, & Verfaellie, 2011; but see Squire et al., 2010). Such findings have led to the suggestion that the hippocampus and vmPFC are critical nodes within a default (Raichle, 2015) or 'core' network that interact to support autobiographical memory and imagination (Addis, 2018; Schacter et al., 2012; Schacter, Benoit, & Szpunar, 2017) (see Behrens et al., 2018; McCormick et al., 2018; Murray, Wise, & Graham, 2017; Robin & Moscovitch, 2017, for related proposals).

Converging evidence has shifted focus towards this neural network-level approach to support the way we reconstruct our personal past and construct possible future experiences (Bellana, Liu, Diamond, Grady, & Moscovitch, 2017; Schacter et al., 2012; Schacter et al., 2017). For instance, studies using functional magnetic resonance imaging (fMRI) have found increased functional connectivity between the hippocampus and vmPFC during both the retrieval of autobiographical memories (McCormick, St-Laurent, Ty, Valiante, & McAndrews, 2015) and the construction of episodic future events (Campbell, Madore, Benoit, Thakral, & Schacter, 2017), and resting state functional connectivity between these regions has been shown to predict the episodic quality of individual's memories (Yang, Bossmann, Schiffhauer, Jordan, & Immordino-Yang, 2013).

The communication of information across networked areas depends on the organization and integrity of the white matter connections between them (Jbabdi & Behrens, 2013). Invasive tract-tracing techniques have revealed a direct hippocampus-to-PFC pathway comprising the major efferent anatomical connection

from the hippocampus to the PFC (Jin & Maren, 2015). In rats, the hippocampus-PFC pathway projects, via the pre-commissural fornix, from ventral CA1 and ventral subiculum to medial PFC (Cenquizca & Swanson, 2007). Similarly in primates, the pre-commissural fornix provides the route for anterior CA1 and subiculum projections to medial and orbitofrontal PFC (Aggleton, Wright, Rosene, & Saunders, 2015). In humans, diffusion-weighted imaging (dWI), which can non-invasively delineate the path of major fiber pathways and evaluate their microstructure through indices such as fractional anisotropy (FA) (Jbabdi & Behrens, 2013), has provided initial evidence for hippocampus-PFC connections via the fornix (Croxson et al., 2005). Building on this work, Christiansen et al. (2016) recently developed an anatomically guided dWI protocol for the selective *in vivo* reconstruction of pre-commissural fornix fibers in humans, allowing investigation of the functions of the human hippocampus-PFC pathway for the first time.

By application of this novel protocol, we investigated the role of the pre-commissural fornix in autobiographical past and future thinking using an individual differences design (Palombo, Sheldon, & Levine, 2018). Participants were asked to recall past experiences and generate future events using word cues according to a modified Galton-Crovitz cue-word paradigm (Crovitz & Schiffman, 1974). White matter microstructure was assessed in these individuals using high angular resolution diffusion-weighted imaging (HARDI) and constrained spherical deconvolution tractography (Dell'Acqua & Tournier, 2019). Given the directed hippocampus-PFC functional connections identified above in relation to (re)constructing events in episodic memory and episodic simulation (Campbell et al., 2017; McCormick et al., 2015), we hypothesized that individual differences in the episodic richness of past and future thinking would be related to the microstructure (FA) of the hippocampus-PFC pathway underpinned by the pre-commissural fornix. As a comparison tract, we used the post-commissural fornix, which connects posterior hippocampus to mammillary bodies and anterior thalamic nuclei (Aggleton, 2012; Christiansen et al., 2016). Since higher values of FA are considered indicative of increased myelination and improved organization, cohesion, and compactness of white matter fiber tracts (Beaulieu, 2002), we predicted a positive association between pre-commissural FA and the episodic richness of past and future constructions.

## Materials and methods

### Participants

Participants were 27 healthy Cardiff University undergraduates (aged 18–22 years, mean age = 19, 25 females). They completed an adapted Galton-Crovitz cue word paradigm (Crovitz & Schiffman, 1974) in a separate session from diffusion-weighted magnetic resonance imaging (dMRI). All participants gave written informed consent before participating. Cardiff University School of Psychology Research Ethics Committee reviewed and approved this research.

### Experimental Design

#### Past-future AI task procedure

Participants completed an adapted version of the Autobiographical Interview (AI) (Addis, Wong, & Schacter, 2008) that probed both past and future events. In each of the two conditions (past, future), ten cue words (e.g. “holiday”, “birthday”) were provided to each participant, in response to which they were asked to recall or imagine a personal event and to generate as much detail as possible within a 1-min time-limit. Each event was required to be spatiotemporally specific, occurring over a timescale of minutes or hours, but no longer than a day. Future events were required to be plausible given the participant’s current plans and not previously experienced by the participant. Three alternate word lists were used; these were matched for semantic category (i.e., participants either heard the cue-word ‘holiday’, ‘journey’ or ‘vacation’). Prior to commencing, participants were instructed:

*“In this test I am going to give you a series of words and ask you to recall an episode from your past, or think of an episode that you might be involved in in the future, related to each of these words. The episode needs to be as specific and detailed as possible. I would like you to give me as much information as you can.”*

In cases where the participant either lacked specificity or detail in their description, the experimenter would provide a non-specific prompt for further information (e.g., *“Is there anything else you can tell me about this event?”*). All trials for one temporal direction (past or future) were completed before beginning the trials for the other condition. Order of presentation of temporal direction (past or future) was counterbalanced, as were the word lists (across the past and future conditions). Participants were tested individually, and responses were recorded using a portable

recording device (Zoom H1 Digital Field Recorder) for subsequent transcription and scoring.

## Scoring

The standardized AI scoring procedure (Levine, Svoboda, Hay, Winocur, & Moscovitch, 2002) was used. Events (past and future) generated were segmented into distinct chunks of information in order to allow analysis of the levels of episodic or semantic information provided within each. These chunks were typically characterized by grammatical clauses that referenced a unique occurrence, observation or thought (Levine et al., 2002). Two broad categories were used to categorize details: 'internal' details (which described the central event) and 'external' details (decontextualized information, including semantic details and information concerning extended events that are not specific in time and place, and repetitions). In the case that a participant described more than one event, the event that was described in the most detail was coded as 'internal' and the other as 'external'. The central event was required to refer to a specific time and place, thus it can be considered 'episodic' and will be referred to as such henceforth. Episodic details included not only time and place details, but also any other episodic information (sensory details, thoughts and emotions) that were part of the central event (Levine et al., 2002). **Figure 1** contains examples of external and episodic details from past and future narratives. Total score was computed by summing over the 10 event narratives.

## Past narrative

|                                                           |                                       |                                                 |
|-----------------------------------------------------------|---------------------------------------|-------------------------------------------------|
| <b>External</b>                                           | <b>External</b>                       | <b>External</b>                                 |
| Vacation um I went to India (.)                           | Saw some elephants (.)                | my sister got married out there (.) Um (.)      |
| <b>External</b>                                           | <b>External</b>                       | <b>External</b>                                 |
| We went to the beach (.)                                  | Went to Panaji the capital of Goa (.) | Um saw the bridge where it was (.)              |
| <b>External</b>                                           |                                       | <b>External</b>                                 |
| in one of the Bourne Identity films or something (.)      |                                       | Erm that's not for me but the boys liked it (.) |
| <b>External</b>                                           |                                       |                                                 |
| Um (.)                                                    | Yeah went for lots of dinners (.)     |                                                 |
| <b>Episodic</b>                                           | <b>Episodic</b>                       | <b>Episodic</b>                                 |
| Um (.) My sister when she got married (.)                 | she looked really nice (.)            | and we were er on the beach (.)                 |
| <b>Episodic</b>                                           | <b>Episodic</b>                       | <b>Episodic</b>                                 |
| and we had the waves coming in (.)                        | And it was sunset (.)                 | and we had like a white gazebo (.)              |
| <b>Episodic</b>                                           |                                       | <b>Episodic</b>                                 |
| her dress was kind of floating around erm in the wind (.) |                                       | and then we all jumped into the sea (.)         |
| <b>Episodic</b>                                           |                                       |                                                 |
| and had our pictures taken (.)                            |                                       |                                                 |

## Future narrative

|                                                                                                                                                                                                                                                                                                                                                                                                                                                                                                                                  |                                                                                                                                                                                                                                                                                                                                                                                                                                                                                                                                  |                                                                                                                                                                                                                                                                                                                                                                                                                                                                                                                                  |
|----------------------------------------------------------------------------------------------------------------------------------------------------------------------------------------------------------------------------------------------------------------------------------------------------------------------------------------------------------------------------------------------------------------------------------------------------------------------------------------------------------------------------------|----------------------------------------------------------------------------------------------------------------------------------------------------------------------------------------------------------------------------------------------------------------------------------------------------------------------------------------------------------------------------------------------------------------------------------------------------------------------------------------------------------------------------------|----------------------------------------------------------------------------------------------------------------------------------------------------------------------------------------------------------------------------------------------------------------------------------------------------------------------------------------------------------------------------------------------------------------------------------------------------------------------------------------------------------------------------------|
| <p><b>External</b><br/>Erm in a couple of weeks (,) I'm going to go on holiday (,) um to Cyprus (.) My stepsister is getting married out there (,) and so we're um going to have the wedding on um the beach front (,) um a lot of her friends and family are going (,) um and I'm gonna be a bridesmaid (.) Um the weather's supposed to be really nice out there (.) Um and erm mmm yeah there's about 20 people going (.) It's gonna be quite a small wedding (.) Um and um yeah we're gonna have dinner at the hotel (.)</p> | <p><b>External</b><br/>Erm in a couple of weeks (,) I'm going to go on holiday (,) um to Cyprus (.) My stepsister is getting married out there (,) and so we're um going to have the wedding on um the beach front (,) um a lot of her friends and family are going (,) um and I'm gonna be a bridesmaid (.) Um the weather's supposed to be really nice out there (.) Um and erm mmm yeah there's about 20 people going (.) It's gonna be quite a small wedding (.) Um and um yeah we're gonna have dinner at the hotel (.)</p> | <p><b>External</b><br/>Erm in a couple of weeks (,) I'm going to go on holiday (,) um to Cyprus (.) My stepsister is getting married out there (,) and so we're um going to have the wedding on um the beach front (,) um a lot of her friends and family are going (,) um and I'm gonna be a bridesmaid (.) Um the weather's supposed to be really nice out there (.) Um and erm mmm yeah there's about 20 people going (.) It's gonna be quite a small wedding (.) Um and um yeah we're gonna have dinner at the hotel (.)</p> |
|----------------------------------------------------------------------------------------------------------------------------------------------------------------------------------------------------------------------------------------------------------------------------------------------------------------------------------------------------------------------------------------------------------------------------------------------------------------------------------------------------------------------------------|----------------------------------------------------------------------------------------------------------------------------------------------------------------------------------------------------------------------------------------------------------------------------------------------------------------------------------------------------------------------------------------------------------------------------------------------------------------------------------------------------------------------------------|----------------------------------------------------------------------------------------------------------------------------------------------------------------------------------------------------------------------------------------------------------------------------------------------------------------------------------------------------------------------------------------------------------------------------------------------------------------------------------------------------------------------------------|

**Figure 1.** Examples of external and episodic details from past and future narratives.

Consensus scoring was established based on the near perfect inter-rater reliability from two raters who scored the past events (intra-class correlation analysis, two-way random model: episodic  $r = 0.99$ ; external  $r = 1.0$ ). The values from one primary coder, who completed both the past and future scoring, were used in the analysis. All raters were blind to dMRI results.

For each event the numbers of episodic and external details were tallied, and the totals were then summed across the 10 events in each condition (past, future) to create episodic and external AI scores for each condition for each participant.

## MRI data acquisition

Imaging data were acquired using a General Electric Healthcare (GE) 3-T HDx MRI system with an 8-channel receive-only head coil, at Cardiff University's Brain Research Imaging Centre (CUBRIC). A standard T1-weighted 3D FSPGR sequence (178 axial slices, 1mm isotropic resolution, TR/TE = 7.8/3.0s, FOV = 256 x 256 x 176mm, 256 x 256 x 176 data matrix, 20° flip angle) provided high-resolution anatomical images.

A diffusion weighted single-shot spin-echo Echo-Planar Imaging (EPI) pulse sequence was used to acquire whole-brain High Angular Resolution Diffusion Image (HARDI) data (60 contiguous slices acquired along an oblique-axial plane with 2.4mm thickness and no gap, TE = 87ms; voxel dimensions = 2.4 x 2.4 x 2.4mm<sup>3</sup>; FOV = 23 x 23 cm<sup>2</sup>; 96 x 96 acquisition matrix). The acquisition was cardiac gated, with 30 isotropic



directions at  $b = 1200 \text{ s/mm}^2$ . In addition, three non-diffusion weighted images were acquired with  $b = 0 \text{ s/mm}^2$ .

## **MRI preprocessing**

### **Diffusion MRI**

Diffusion MRI (dMRI) data were preprocessed using ExploreDTI v4.8.3 (Leemans & Jones, 2009). Distortions resulting from eddy currents and participant head motion were corrected. A particular issue for white matter pathways located near the ventricles (e.g., the fornix), is free water contamination from cerebrospinal fluid. This has been shown to significantly affect tract delineation (Concha, Gross, & Beaulieu, 2005). Thus, to correct for voxel-wise partial volume artifacts arising from free water contamination, the two-compartment 'Free Water Elimination' (FWE) procedure (Pasternak, Sochen, Gur, Intrator, & Assaf, 2009) was applied – this improves Diffusion Tensor Imaging (DTI)-based tract reconstruction and tissue specificity (Pasternak et al., 2014). Following FWE, corrected diffusion tensor indices were computed. Fractional anisotropy (FA) – a DTI-based index proposed to reflect axonal organization (Pierpaoli, Jezzard, Basser, Barnett, & Di Chiro, 1996), reflects the extent to which diffusion within biological tissue is anisotropic (constrained along a single axis) (Beaulieu, 2002). FA values can range from 0 (fully isotropic) to 1 (fully anisotropic). The resulting free water corrected FA maps were inputs for the tractography analysis.

### **Tractography**

Deterministic tractography was performed from all voxels based on constrained spherical deconvolution (CSD) (Dell'Acqua & Tournier, 2019; Jeurissen, Leemans, Jones, Tournier, & Sijbers, 2011). CSD allows for the representation of bending/crossing/kissing fibers in individual voxels, as multiple peaks in the fiber orientation density function (fODF) can be extracted within each voxel (Dell'Acqua & Tournier, 2019). The step size was 1mm, and the fODF amplitude threshold was 0.1. An angle threshold of  $30^\circ$  was used to prevent the reconstruction of anatomically implausible fibers.

To generate 3D fiber reconstructions of each tract segment, waypoint region-of-interest (ROI) gates were drawn manually onto whole-brain free water corrected FA

maps. The waypoint ROIs defined the tracts based on a 'SEED' point and Boolean logical operations: 'NOT' and 'AND'. The 'NOT' and 'AND' gates corresponded to whether tracts passing through were omitted from analyses or retained, respectively. These gates were combined to reconstruct the tracts, based on anatomical plausibility. Initially, a multiple ROI approach was applied to reconstruct the fornix (see Hodgetts, Postans, et al., 2017; Metzler-Baddeley, Jones, Belaroussi, Aggleton, & O'Sullivan, 2011).

### Fornix reconstruction

A 'SEED' point ROI was placed on the coronal plane, encompassing the body of the fornix. An 'AND' ROI was placed on the axial plane, capturing the crus fornici in both hemispheres at the lower part of the splenium of the corpus callosum. 'NOT' ROIs were placed intersecting the corpus callosum on the axial plane, and anterior to the fornix pillars and posterior to the crus fornici on the coronal plane. Further 'NOT' way-gates were placed after the initial reconstruction and ensuing visual inspection, to remove anatomically implausible fibers. Subsequently, the anterior body of the fornix was split into the pre- and post- commissural column segments (**Figure 2**).

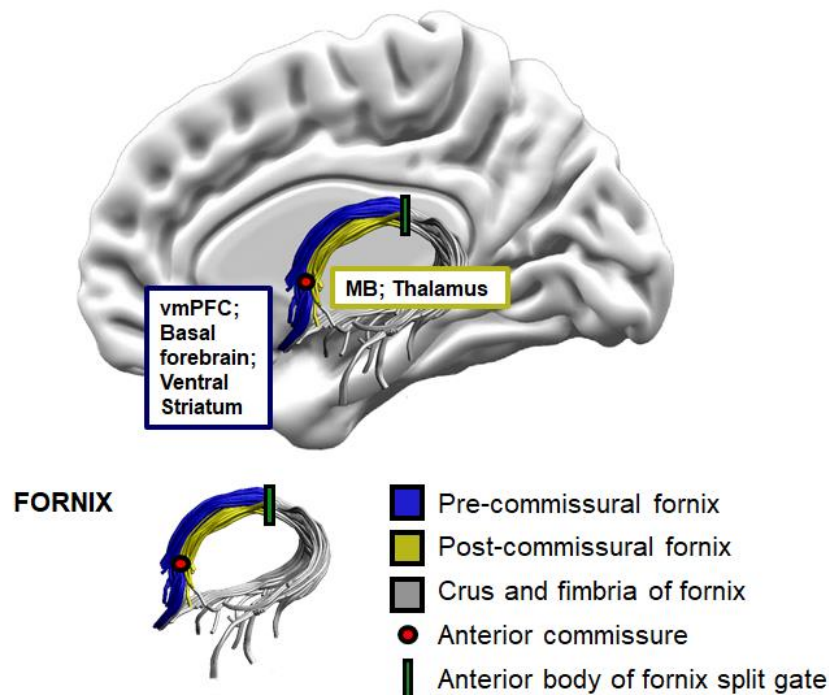

**Figure 2.** Schematic illustration of the anatomical landmarks for fornix tract sub-division, and the connecting areas of interest. vmPFC = Ventromedial Prefrontal Cortex; MB = Mammillary Bodies.

Waypoint ROIs for the pre-post split (**Figure 3**) were based on the protocol described in Christiansen et al. (2016), and example tract reconstructions are depicted in **Figure 4**. After tract reconstruction for each participant, mean FA values were calculated by averaging the values at each 1mm step along each segment.

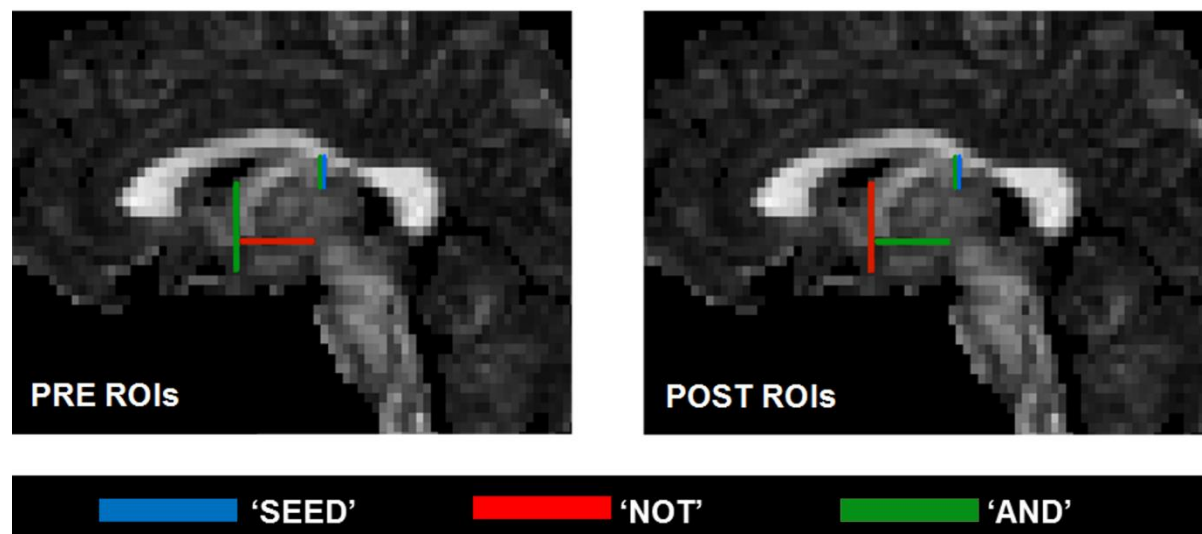

**Figure 3.** Waypoint region-of-interest (ROI) gates used for reconstructing the pre- and post- commissural fornix tract segments (Blue = SEED, Red = NOT, Green = AND).

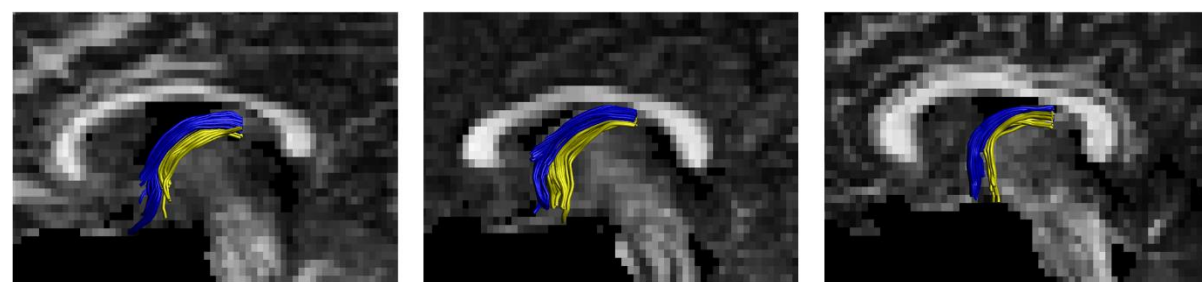

**Figure 4.** Example reconstructions for the pre- and post- commissural fornix segments (Blue = Pre, Yellow = Post).

### Pre- and post- commissural fornix reconstruction

The fornix was split, isolating the anterior-body, by an 'AND' gate positioned at the point of the downward bend to the crus and fimbria of the fornix. In line with

Christiansen et al. (2016), fibers of the crus and fimbria of the fornix were excluded from the anterior-body and hence pre- and post- commissural fornix reconstructions. Partial volume effects due to the intermingling of the two fiber populations beyond the crus were, therefore, minimized (Saunders & Aggleton, 2007). In addition, this procedure avoided ‘jumping’ where tract voxels that pass close to, or across, neighboring tract voxels ‘jump’ onto them (Jones & Cercignani, 2010). This split was conducted using the tract segmentation tool “splitter” within ExploreDTI v4.8.3.

The anterior-body of the fornix was then divided into the pre- and post-commissural segments. This delineation took advantage of the manner in which the fibers separate at the anterior columns of the fornix. At this level, the segments contain approximately the same number of fibers (Powell, Guillery, & Cowan, 1957). The pre-commissural fornix was delineated by positioning an additional ‘AND’ gate on the coronal plane at the anterior-commissure, as well as an additional ‘NOT’ gate meeting this ‘AND’ gate on the axial plane. For the post-commissural fornix reconstruction, the additional ‘NOT’ and ‘AND’ gates placed for reconstruction of the pre-commissural fornix were swapped (see **Figure 3**). Thus, for the pre-commissural fornix, tracts were included only if they extended anterior to the anterior commissure, and for the post-commissural fornix only tracts running posterior to the anterior commissure were retained (see **Figure 4**) (Christiansen et al., 2016).

### **Grey matter volumetrics**

T1-weighted images were corrected for spatial intensity variations using FMRIB's Automated Segmentation Tool (FAST; Zhang, Brady, & Smith, 2001). Bilateral grey matter volumes (expressed as a proportion of estimated total intracranial volume) of the hippocampus were subsequently obtained using FMRIB's Integrated Registration & Segmentation Tool (FIRST; Patenaude, Smith, Kennedy, & Jenkinson, 2011). Volumes for the vmPFC ROI were derived using FreeSurfer (surfer.nmr.mgh.harvard.edu: Destrieux, Fischl, Dale, & Halgren, 2010), via summing volumes of the medial orbitofrontal cortex (mOFC) and rostral anterior cingulate cortex (rACC) parcels. One participant was removed from the grey matter analyses due to poor overall data quality on the T1 FSPGR.

## Statistical Analysis

Directional Pearson's correlations were conducted between individual's total scores of episodic and external details produced for the ten past and future narratives; and individual's episodic past and future scores and their FA values for the pre- and post-commissural fornix. Vovk-Sellke Maximum (VS-MPR)  $p$ -ratios were computed: based on the  $p$ -value, the maximum possible odds in favor of  $H_1$  over  $H_0$  equals  $1/(-e \log(p))$  for  $p \leq .37$  (Sellke, Bayarri, & Berger, 2001). Complementary non-parametric Spearman's rho rank tests were also conducted for the key correlations. These are less sensitive to potential outliers and differences in range (Croux & Dehon, 2010). In addition, partial correlations were conducted for the key episodic-fornix microstructure correlations, to control for the contribution of the number of external details given and regional grey matter volume. All analyses were conducted in JASP (2018, version 0.9.1.0).

## Results

### Correlations between tract microstructure and past-future AI scores

#### *Number of details produced (episodic and external) for the past and future narratives*

Consistent with previous studies (e.g. Addis, Sacchetti, Ally, Budson, & Schacter, 2009; Addis et al., 2008; Race et al., 2011), the total number of episodic details (summed across the 10 cue words) an individual recalled for the past (mean = 121.3, median = 114, SD = 40.8, range = 64 - 247) correlated strongly with the number of episodic details imagined for the future (mean = 59.3, median = 54, SD = 23.4, range = 27 - 105) (**Figure 5A**. Pearson's  $r = 0.69$ ,  $p < 0.001$ , VS-MPR = 1027.33). Additionally, in line with previous studies, there were significantly more episodic details given for the past in comparison to the future ( $t(26) = 10.75$ ,  $p < 0.001$ ,  $d_z = 2.07$ , paired t-test). The number of external details an individual recalled for the past (mean = 73.8, median = 71, SD = 39, range = 20 - 182) also correlated significantly with the number of external details imagined for the future (mean = 86.5, median = 75, SD = 40.8, range = 23 - 198) (**Figure 5B**. Pearson's  $r = 0.73$ ,  $p < 0.001$ , VS-MPR = 3254.64). There were also significantly more external details given for the future in comparison to the past ( $t(26) = 2.23$ ,  $p = 0.035$ ,  $d_z = 0.43$ , paired t-test). The number of episodic details an individual recalled for the past also correlated with the number of external details recalled for the past (Pearson's  $r = 0.35$ ,  $p = 0.035$ , VS-MPR = 3.15); this was not the case, however, for the future (Pearson's  $r = -0.16$ ,  $p = 0.783$ , VS-MPR = 1.00).

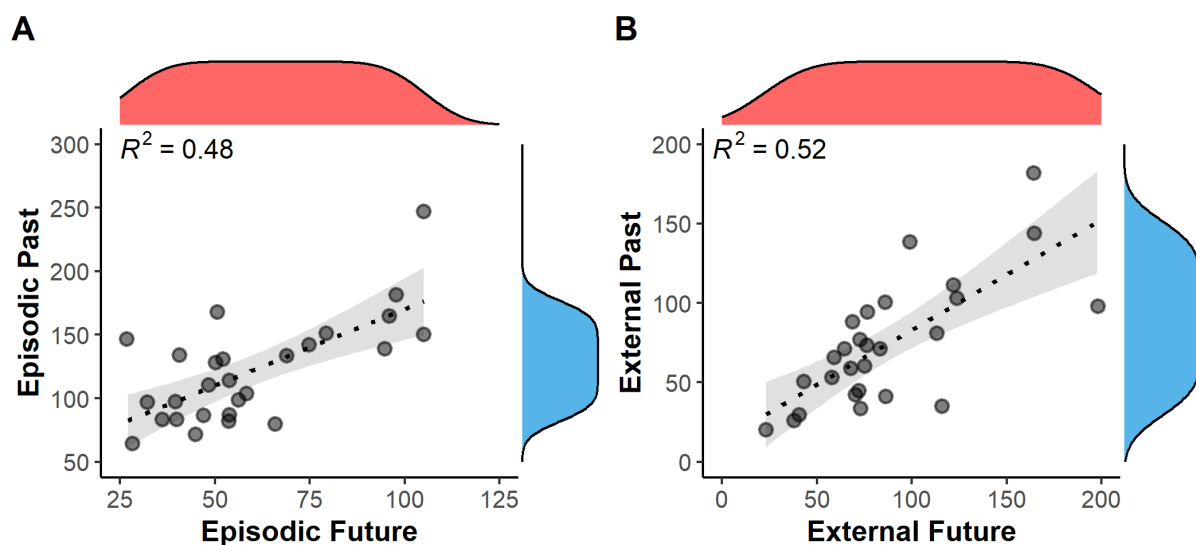

**Figure 5 (A, B).** Scatterplots depicting correlations between the number of details produced for the past versus the future AI narratives (A. Episodic, B. External) ( $N=27$ ). Marginal density is displayed on the opposite axis. Grey shading equals the 95% CI.

#### *Episodic past details and pre-/post- commissural fornix FA*

We found a significant positive correlation between the number of past episodic details and pre-commissural fornix FA (**Figure 6A**, Pearson's  $r = 0.49$ ,  $p = 0.005$ , VS-MPR = 14.49, Spearman's  $\rho = 0.464$ ,  $p = 0.007$ , VS-MPR = 10.09). There was no significant correlation between post-commissural fornix FA and episodic past details (**Figure 6B**, Pearson's  $r = -0.12$ ;  $p = 0.725$ , VS-MPR = 1.00, Spearman's  $\rho = 0.02$ ,  $p = 0.457$ , VS-MPR = 1.00). The correlation between episodic past details and pre-commissural fornix FA was significantly greater than between episodic past details and post-commissural fornix FA (Steiger  $z(27) = 2.29$ ,  $p = 0.011$ ) (computed using R package cocor, Diedenhofen & Musch, 2015).



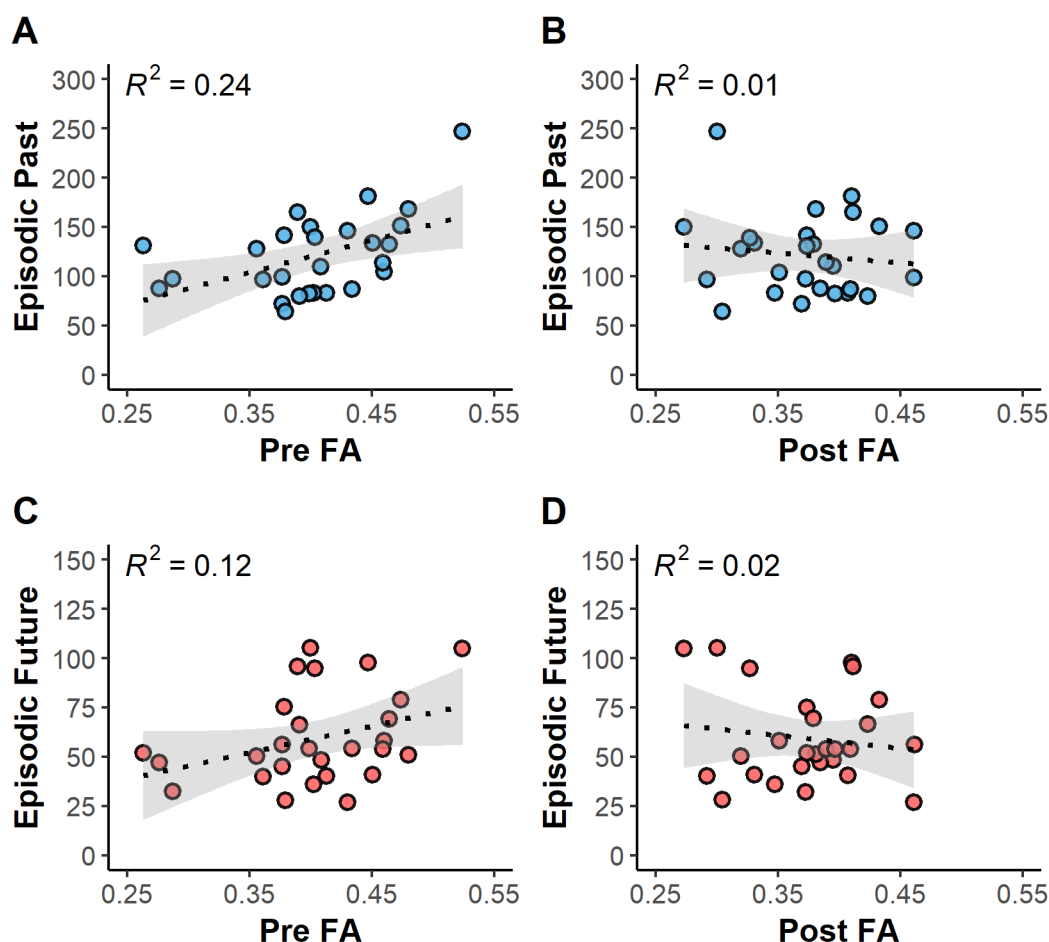

**Figure 6 (A-D).** Scatterplots depicting the correlations of episodic past (A, B) and future (C, D) AI details with pre-/post- commissural fornix microstructure (fractional anisotropy, FA). Number of episodic past/future details (summed over 10 cue words) is plotted on the y-axis ( $N=27$ ). Grey shading equals the 95% CI.

The correlation between episodic past details and pre-commissural fornix FA was also significantly greater than between external past details and pre-commissural fornix FA (Steiger  $z$  (27) = 1.69,  $p$  = 0.046). Additionally, when controlling for the number of external details produced by the individual, the correlation between episodic past details and pre-commissural fornix FA remained significant (Pearson's  $r$  = 0.48,  $p$  = 0.007, Spearman's  $\rho$  = 0.47,  $p$  = 0.007).

#### *Episodic future details and pre-/post- commissural fornix FA*

The findings for the episodic future simulation details mirrored those for the episodic past retrieval. There was a significant positive correlation between the total number of future episodic details (summed over the 10 cue words) and pre-commissural fornix

FA (**Figure 6C**. Pearson's  $r = 0.35$ ,  $p = 0.035$ , VS-MPR = 3.11, Spearman's  $\rho = 0.33$ ,  $p = 0.045$ , VS-MPR = 2.62), and, correspondingly, there was no significant correlation between episodic future details and post-commissural fornix FA (**Figure 6D**. Pearson's  $r = -0.14$ ,  $p = 0.752$ , VS-MPR = 1.00, Spearman's  $\rho = 0.09$ ,  $p = 0.330$ , VS-MPR = 1.01). The correlation between episodic future details and pre-commissural fornix FA was also significantly greater than between episodic future details and post-commissural fornix FA (Steiger  $z(27) = 1.78$ ,  $p = 0.038$ ). The correlation between episodic future details and pre-commissural fornix FA was not significantly greater than between external future details and pre-commissural fornix FA, however, when controlling for the number of external details given the correlation between episodic future details and pre-commissural fornix FA remained significant (Pearson's  $r = 0.38$ ,  $p = 0.028$ , Spearman's  $\rho = 0.33$ ,  $p = 0.0499$ ).

### **Influence of grey matter volume**

When hippocampal volume was controlled for, the correlation between past episodic details and pre-commissural fornix FA remained significant (partial correlation: Pearson's  $r = 0.49$ ,  $p = 0.006$ ), and there was no significant association between post-commissural fornix FA and episodic past details (partial correlation: Pearson's  $r = -0.09$ ,  $p = 0.341$ ). Likewise, the correlation between future episodic details and pre-commissural fornix FA remained significant when controlling for hippocampal volume (partial correlation: Pearson's  $r = 0.37$ ,  $p = 0.035$ ), and there was no significant association between post-commissural fornix FA and episodic future details (partial correlation: Pearson's  $r = 0.04$ ,  $p = 0.422$ ).

Similarly, when vmPFC volume was controlled for, the correlation between past episodic details and pre-commissural fornix FA remained significant (partial correlation: Pearson's  $r = 0.54$ ,  $p = 0.003$ ), and there was no significant correlation between post-commissural fornix FA and past episodic details (partial correlation: Pearson's  $r = -0.22$ ,  $p = 0.143$ ). For the future simulations, the correlation between the number of episodic details and pre-commissural fornix FA remained significant when controlling for vmPFC volume (partial correlation: Pearson's  $r = 0.36$ ,  $p = 0.037$ ), and there was no significant correlation between post-commissural fornix FA and episodic future details (partial correlation: Pearson's  $r = -0.19$ ,  $p = 0.178$ ).



## Discussion

The goal of this study was to investigate the role of the direct hippocampal-vmPFC pathway, formed by the pre-commissural fornix, in autobiographical past and future thinking. We applied a novel anatomically-guided protocol that allows the pre-commissural and post-commissural fornix fibers to be separately reconstructed *in vivo* (Christiansen et al., 2016). To assess both past- and future-oriented thinking, we used an adapted autobiographical cueing paradigm (Addis et al., 2008; Crovitz & Schiffman, 1974) alongside a validated coding scheme that specifically parses episodic from non-episodic detail within individuals' real-world descriptions (Hodgetts, Postans, et al., 2017; Levine et al., 2002). Using this approach, we found that inter-individual variation in *pre-commissural*, but not *post-commissural*, fornix microstructure was significantly correlated with the amount of episodic detail produced during the construction of both past and future events. Critically, this effect was still seen when controlling non-episodic content. These findings deepen our understanding of hippocampal-vmPFC interactions in human episodic autobiographical memory and future thinking and provide a 'structural realization' of hippocampal-vmPFC functional connectivity (Kosslyn & Van Kleeck, 1990), that is, a direct relationship between the microstructure of the fiber pathway connecting these distributed regions and individual differences in episodic past and future thinking.

Our findings highlight the importance of direct hippocampus-PFC connectivity mediated by the pre-commissural fornix (Aggleton et al., 2015; Cenquizca & Swanson, 2007; Jin & Maren, 2015), in episodic construction across past and future events. This builds upon previous fMRI studies that have shown that functional coupling between these distributed regions is increased during both the retrieval of autobiographical memories and the construction of future events (Campbell et al., 2017; McCormick et al., 2015). One recent study, which used structural equation modelling of fMRI data, found increased functional connectivity from anterior hippocampus to vmPFC when participants retrieved autobiographical memories in response to cue words (McCormick et al., 2015). Similarly, another investigation applied dynamic causal modeling to fMRI data and found that anterior hippocampus to vmPFC effective connectivity increased specifically during the initial construction of episodic future events (Campbell et al., 2017). From this, the authors proposed that 'the hippocampus

initiates event construction in response to retrieval cues, which then drives activation in the vmPFC where episodic details may be further integrated'.

This conceptualization is consistent with previous work in both humans and rodents that demonstrated that hippocampal activity precedes medial PFC activity during memory retrieval (McCormick et al., 2015; Place, Farovik, Brockmann, & Eichenbaum, 2016), and with findings in rodents that ventral hippocampus mediates theta drive to vmPFC (O'Neill, Gordon, & Sigurdsson, 2013). Optogenetic studies in mice (e.g. Ciochi, Passecker, Malagon-Vina, Mikus, & Klausberger, 2015) have also shown that during memory retrieval ventral hippocampal signals carrying contextual information are sent directly to medial PFC, facilitating coordinated activity between these areas.

The precise contributions of the hippocampus and vmPFC to episodic memory and future thinking are hotly debated. As noted earlier, the pre-commissural fornix originates primarily from the ventral (rodent) or anterior (primate) hippocampus, particularly the subiculum and CA1 (Aggleton et al., 2015; Cenquizca & Swanson, 2007), whereas the post-commissural fornix arises from the posterior hippocampus (Aggleton et al., 2015). Thus, our findings have implications for understanding functional specializations or gradients within the hippocampus itself, and how these are reflected in its extrinsic connectivity (Poppenk & Moscovitch, 2011; Strange, Witter, Lein, & Moser, 2014). According to scene construction theory, the anterior hippocampus, and particularly the subiculum, plays a central role in forming representations of spatially coherent scenes across memory, perception and imagination (Hodgetts, Voets, et al., 2017; Zeidman & Maguire, 2016), and these conjunctive scene representations have been proposed to provide a scaffold when constructing both past and future events (Barry & Maguire, 2019; Murray et al., 2017; Robin, 2018). In contrast, the constructive episodic simulation hypothesis contends that the construction of spatial contexts arises out of a general relational processing mechanism housed in anterior hippocampus, which is also responsible for the integration of other event details into the event representation (Addis, 2018; Schacter et al., 2012; Schacter et al., 2017).

Other accounts emphasize graded representations along the hippocampal long-axis. In particular, both human neuroimaging and electrophysiological studies in rodents

suggest an anterior–posterior gradient in the ‘scale’ of spatial/event representations in the hippocampus (Brunec et al., 2018; Buzsáki & Moser, 2013; Komorowski et al., 2013; Nielson, Smith, Sreekumar, Dennis, & Sederberg, 2015; Sheldon & Levine, 2016), in which the anterior hippocampus forms coarser, ‘gist-like’ generalized representations of extended events or contexts and the posterior hippocampus represents finer-grained perceptual and spatiotemporal detail (Addis, 2018). As we used broad retrieval cues, featuring extended events like ‘holiday’, our experiment may have emphasized construction processes mediated by anterior hippocampus. More specific cues leading directly to detailed representations may entail earlier posterior hippocampal activity. This is an important area for future studies to explore.

The vmPFC’s contribution to episodic construction, by contrast, has been linked to demands on schematic representations (Campbell et al., 2017; Robin & Moscovitch, 2017), in particular the self-schema (Buckner & Carroll, 2007; D’Argembeau, 2013). For instance, Kurczek et al. (2015) (see also Verfaellie, Wank, Reid, Race, & Keane, 2019) compared the number of references to ‘the self’ included in autobiographical event narratives from patients with bilateral hippocampal or medial PFC damage as well as healthy controls. Patients with medial PFC damage, despite being able to construct highly detailed episodic events, produced relatively few self-references, and they incorporated themselves in the narratives of their (re)constructions less frequently than the healthy participants. Patients with hippocampal damage showed the opposite pattern: they were impaired in their ability to construct highly detailed episodic events across time periods but not in their incorporation of the self. We have previously suggested (Murray et al., 2017) that hippocampal-vmPFC connectivity serves to (re)create complex conjunctive representations in which one’s self is oriented in a particular time, place, and overall situational context (Murray et al., 2017). These conjunctive representations may subsequently constrain further retrieval and construction by the hippocampus (Campbell et al., 2017; Graham, Barense, & Lee, 2010; Place et al., 2016; Preston & Eichenbaum, 2013). Thus, recall/imagination of personally relevant episodes involves a prefrontal system which can work in conjunction with the MTL system to help individuals recombine episodic details to construct a *personally relevant* past/future event (but see Barry & Maguire, 2019; Ciaramelli, De Luca, Monk, McCormick, & Maguire, 2019; McCormick et al., 2018, scene construction theory, for a view which de-emphasizes self-processes).

Critically, the pre-commissural fornix does not carry reciprocal projections from the vmPFC to the hippocampus (which are indirect via the thalamic nucleus reuniens and entorhinal cortex) (Murray et al., 2017; Preston & Eichenbaum, 2013), but only carries connections to the vmPFC from the anterior hippocampus. While several models of episodic memory emphasize the importance of bi-directional interactions between hippocampus and vmPFC (e.g. Manns, Howard, & Eichenbaum, 2007; Preston & Eichenbaum, 2013; Robin & Moscovitch, 2017), with vmPFC playing a regulatory (Barry & Maguire, 2019; Manns et al., 2007; Preston & Eichenbaum, 2013; Robin & Moscovitch, 2017) or even initiating (Barry, Barnes, Clark, & Maguire, 2019; McCormick et al., 2018) role in episodic construction, our findings reveal that the direct inputs that the hippocampus provides to vmPFC are a critical source of individual differences in episodic memory and future thinking, and that the pre-commissural fornix is a key link in this broader hippocampal-vmPFC circuit.

While these findings highlight a key role for anterior hippocampal connectivity with medial PFC in constructing self-relevant event representations, previous work in both humans and rodents have emphasized the importance of connections between the hippocampus and medial diencephalon (i.e., mammillary bodies and thalamus) in spatial and contextual memory (Aggleton & Brown, 1999), which is mediated by the *post*-commissural fornix (Christiansen et al., 2016). While the current findings seemingly challenge this account, it is important to note that the post-commissural fornix tract reconstructions principally involve the connections of the hippocampus with the hypothalamus, including the mammillary bodies, and largely exclude the projections to the anterior thalamic nuclei, as these turn towards posterior regions as the fornix columns descend (Christiansen et al., 2016; Poletti & Creswell, 1977). Indeed, previous work has demonstrated that thalamic degeneration can impair episodic autobiographical memory and future thinking (Irish, Hodges, & Piguet, 2013). Notably, however, Vann (2013) found that lesions to the descending post-commissural fornix columns in rats did not impact on spatial memory tests that are sensitive to mammillary body, mammillothalamic tract, anterior thalamic, and hippocampal lesions. The implication of this finding is that the hippocampal-mammillary connection may not be important for all classes of episodic memory, particularly those that place demand on constructive and self-referential processing.

532

533 Although FA is highly sensitive to the microstructure of fibers, it lacks biological  
534 specificity, and may reflect myelination, axon diameter and packing density, axon  
535 permeability and fiber geometry (Concha, Livy, Beaulieu, Wheatley, & Gross, 2010;  
536 Jones, Knösche, & Turner, 2013). Each of these may differently affect communication  
537 efficiency and synchronicity between distal brain regions (Jbabdi & Behrens, 2013)  
538 and be influenced by distinct genetic and environmental factors (Budisavljevic et al.,  
539 2015). Future studies using novel approaches to estimate specific microstructural  
540 properties including axon density (Assaf, Johansen-Berg, & Thiebaut de Schotten,  
541 2017) will provide further insight into the specific biological attributes underlying these  
542 brain-cognition associations. Further, while our sample size was comparable to related  
543 investigations (Hodgetts, Postans, et al., 2017; Palombo, Bacopulos, et al., 2018), and  
544 VS-MPRs showed that our findings provide a good level of diagnosticity, it will be  
545 important to replicate these effects in larger samples.

546

547 In summary, we report a novel association between white matter microstructure of the  
548 pre-commissural fornix and episodic past and future thinking, thus elucidating a  
549 potential anatomical mechanism by which direct hippocampal and vmPFC connectivity  
550 support constructive episodic processing. These findings provide important support  
551 for the idea of a core-network supporting both the re-construction of past events and  
552 the construction of hypothetical events in the future, and that individual differences in  
553 structural connectivity may reflect how richly people can reconstruct the past and  
554 construct possible futures.

555

## **Acknowledgments**

We would like to thank Ofer Pasternak and Greg Parker for providing the free water correction pipeline, John Evans for scanning support, and Naomi Warne for assisting with transcription and autobiographical memory task coding.

AW, MP, KG, AL and CH are supported by funds from the Medical Research Council (MR/N01233X/1) and a Wellcome Trust Strategic Award (104943/Z/14/Z). SR is supported via an ESRC Wales Doctoral Training Partnership PhD studentship.

## References

- Addis, D. R. (2018). Are episodic memories special? On the sameness of remembered and imagined event simulation. *Journal of the Royal Society of New Zealand*, 48(2-3), 64-88. doi:10.1080/03036758.2018.1439071
- Addis, D. R., Sacchetti, D. C., Ally, B. A., Budson, A. E., & Schacter, D. L. (2009). Episodic simulation of future events is impaired in mild Alzheimer's disease. *Neuropsychologia*, 47(12), 2660-2671. doi:10.1016/j.neuropsychologia.2009.05.018
- Addis, D. R., Wong, A. T., & Schacter, D. L. (2007). Remembering the past and imagining the future: common and distinct neural substrates during event construction and elaboration. *Neuropsychologia*, 45(7), 1363-1377. doi:10.1016/j.neuropsychologia.2006.10.016
- Addis, D. R., Wong, A. T., & Schacter, D. L. (2008). Age-related changes in the episodic simulation of future events. *Psychological Science*, 19(1), 33-41. doi:10.1111/j.1467-9280.2008.02043.x
- Aggleton, J. P. (2012). Multiple anatomical systems embedded within the primate medial temporal lobe: implications for hippocampal function. *Neuroscience & Biobehavioral Reviews*, 36(7), 1579-1596. doi:10.1016/j.neubiorev.2011.09.005
- Aggleton, J. P., & Brown, M. W. (1999). Episodic memory, amnesia, and the hippocampal–anterior thalamic axis. *Behavioral and Brain Sciences*, 22(3), 425-444. doi:10.1017/S0140525X99002034
- Aggleton, J. P., Wright, N. F., Rosene, D. L., & Saunders, R. C. (2015). Complementary patterns of direct amygdala and hippocampal projections to the macaque prefrontal cortex. *Cerebral Cortex*, 25(11), 4351-4373. doi:10.1093/cercor/bhv019
- Assaf, Y., Johansen-Berg, H., & Thiebaut de Schotten, M. (2017). The role of diffusion MRI in neuroscience. *NMR in Biomedicine*, 32(e3762), 1-16. doi:10.1002/nbm.3762
- Barry, D. N., Barnes, G. R., Clark, I. A., & Maguire, E. A. (2019). The neural dynamics of novel scene imagery. *Journal of Neuroscience*, 39(22), 4375-4386. doi:10.1523/JNEUROSCI.2497-18.2019



- Barry, D. N., & Maguire, E. A. (2019). Remote memory and the hippocampus: a constructive critique. *Trends in Cognitive Sciences*, 23(2), 128-142. doi:10.1016/j.tics.2018.11.005
- Beaulieu, C. (2002). The basis of anisotropic water diffusion in the nervous system—a technical review. *NMR in Biomedicine*, 15(7-8), 435-455. doi:10.1002/nbm.782
- Behrens, T. E., Muller, T. H., Whittington, J. C., Mark, S., Baram, A. B., Stachenfeld, K. L., & Kurth-Nelson, Z. (2018). What is a cognitive map? Organizing knowledge for flexible behavior. *Neuron*, 100(2), 490-509. doi:10.1016/j.neuron.2018.10.002
- Bellana, B., Liu, Z. X., Diamond, N., Grady, C., & Moscovitch, M. (2017). Similarities and differences in the default mode network across rest, retrieval, and future imagining. *Human Brain Mapping*, 38(3), 1155-1171. doi:10.1002/hbm.23445
- Benoit, R. G., & Schacter, D. L. (2015). Specifying the core network supporting episodic simulation and episodic memory by activation likelihood estimation. *Neuropsychologia*, 75, 450-457. doi:10.1016/j.neuropsychologia.2015.06.034
- Brunec, I. K., Bellana, B., Ozubko, J. D., Man, V., Robin, J., Liu, Z.-X., . . . Barense, M. D. (2018). Multiple scales of representation along the hippocampal anteroposterior axis in humans. *Current Biology*, 28(13), 2129-2135. doi:10.1016/j.cub.2018.05.016
- Buckner, R. L., & Carroll, D. C. (2007). Self-projection and the brain. *Trends in Cognitive Sciences*, 11(2), 49-57. doi:10.1016/j.tics.2006.11.004
- Budisavljevic, S., Kawadler, J. M., Dell'Acqua, F., Rijdsdijk, F. V., Kane, F., Picchioni, M., . . . Kalidindi, S. (2015). Heritability of the limbic networks. *Social cognitive and affective neuroscience*, 11(5), 746-757. doi:10.1093/scan/nsv156
- Buzsáki, G., & Moser, E. I. (2013). Memory, navigation and theta rhythm in the hippocampal-entorhinal system. *Nature Neuroscience*, 16(2), 130-138. doi:10.1038/nn.3304
- Campbell, K. L., Madore, K. P., Benoit, R. G., Thakral, P. P., & Schacter, D. L. (2017). Increased hippocampus to ventromedial prefrontal connectivity during the construction of episodic future events. *Hippocampus*, 1-5. doi:10.1002/hipo.22812



- 629 Cenquizca, L. A., & Swanson, L. W. (2007). Spatial organization of direct  
630 hippocampal field CA1 axonal projections to the rest of the cerebral cortex.  
631 *Brain Research Reviews*, 56(1), 1-26. doi:10.1016/j.brainresrev.2007.05.002
- 632 Christiansen, K., Aggleton, J. P., Parker, G. D., O'sullivan, M. J., Vann, S. D., &  
633 Metzler-Baddeley, C. (2016). The status of the precommissural and  
634 postcommissural fornix in normal ageing and mild cognitive impairment: an  
635 MRI tractography study. *NeuroImage*, 130, 35-47.  
636 doi:10.1016/j.neuroimage.2015.12.055
- 637 Ciaramelli, E., De Luca, F., Monk, A. M., McCormick, C., & Maguire, E. A. (2019).  
638 What" wins" in VMPFC: scenes, situations, or schema? *Neuroscience &*  
639 *Biobehavioral Reviews*, 100, 208-210. doi:10.1016/j.neubiorev.2019.03.001
- 640 Cioocchi, S., Passecker, J., Malagon-Vina, H., Mikus, N., & Klausberger, T. (2015).  
641 Selective information routing by ventral hippocampal CA1 projection neurons.  
642 *Science*, 348(6234), 560-563. doi:10.1126/science.aaa3245
- 643 Concha, L., Gross, D. W., & Beaulieu, C. (2005). Diffusion tensor tractography of the  
644 limbic system. *American Journal of Neuroradiology*, 26(9), 2267-2274.
- 645 Concha, L., Livy, D. J., Beaulieu, C., Wheatley, B. M., & Gross, D. W. (2010). In vivo  
646 diffusion tensor imaging and histopathology of the fimbria-fornix in temporal  
647 lobe epilepsy. *Journal of Neuroscience*, 30(3), 996-1002.  
648 doi:10.1523/JNEUROSCI.1619-09.2010
- 649 Croux, C., & Dehon, C. (2010). Influence functions of the Spearman and Kendall  
650 correlation measures. *Statistical Methods & Applications*, 19(4), 497-515. doi:  
651 10.1007/s10260-010-0142-z
- 652 Crovitz, H. F., & Schiffman, H. (1974). Frequency of episodic memories as a function  
653 of their age. *Bulletin of the Psychonomic Society*, 4(5), 517-518.  
654 doi:10.3758/BF03334277
- 655 Croxson, P. L., Johansen-Berg, H., Behrens, T. E., Robson, M. D., Pinski, M. A.,  
656 Gross, C. G., . . . Rushworth, M. F. (2005). Quantitative investigation of  
657 connections of the prefrontal cortex in the human and macaque using  
658 probabilistic diffusion tractography. *Journal of Neuroscience*, 25(39), 8854-  
659 8866. doi:10.1523/JNEUROSCI.1311-05.2005
- 660 D'Argembeau, A. (2013). On the role of the ventromedial prefrontal cortex in self-  
661 processing: the valuation hypothesis. *Frontiers in Human Neuroscience*,  
662 7(372), 1-13. doi:10.3389/fnhum.2013.00372

- Dell'Acqua, F., & Tournier, J. D. (2019). Modelling white matter with spherical deconvolution: how and why? *NMR in Biomedicine*, 32(e3945), 1-18. doi:10.1002/nbm.3945
- Destrieux, C., Fischl, B., Dale, A., & Halgren, E. (2010). Automatic parcellation of human cortical gyri and sulci using standard anatomical nomenclature. *NeuroImage*, 53(1), 1-15. doi:10.1016/j.neuroimage.2010.06.010
- Diedenhofen, B., & Musch, J. (2015). cocor: a comprehensive solution for the statistical comparison of correlations. *PLOS One*, 10(4), e0121945. doi:10.1371/journal.pone.0121945
- Graham, K. S., Barense, M. D., & Lee, A. C. (2010). Going beyond LTM in the MTL: a synthesis of neuropsychological and neuroimaging findings on the role of the medial temporal lobe in memory and perception. *Neuropsychologia*, 48(4), 831-853. doi:10.1016/j.neuropsychologia.2010.01.001
- Hodgetts, C. J., Postans, M., Warne, N., Varnava, A., Lawrence, A. D., & Graham, K. S. (2017). Distinct contributions of the fornix and inferior longitudinal fasciculus to episodic and semantic autobiographical memory. *Cortex*, 94, 1-14. doi:10.1016/j.cortex.2017.05.010
- Hodgetts, C. J., Voets, N. L., Thomas, A. G., Clare, S., Lawrence, A. D., & Graham, K. S. (2017). Ultra-high-field fMRI reveals a role for the subiculum in scene perceptual discrimination. *Journal of Neuroscience*, 37(12), 3150-3159. doi:10.1523/JNEUROSCI.3225-16.2017
- Irish, M., Hodges, J. R., & Piguet, O. (2013). Episodic future thinking is impaired in the behavioural variant of frontotemporal dementia. *Cortex*, 49(9), 2377-2388. doi:10.1016/j.cortex.2013.03.002
- JASP. (2018). JASP Team (Version 0.9.1.0) [Computer software]. Retrieved from <https://jasp-stats.org/>
- Jbabdi, S., & Behrens, T. E. (2013). Long-range connectomics. *Annals of the New York Academy of Sciences*, 1305(1), 83-93. doi:10.1111/nyas.12271
- Jeurissen, B., Leemans, A., Jones, D. K., Tournier, J. D., & Sijbers, J. (2011). Probabilistic fiber tracking using the residual bootstrap with constrained spherical deconvolution. *Human Brain Mapping*, 32(3), 461-479. doi:10.1002/hbm.21032

- Jin, J., & Maren, S. (2015). Prefrontal-hippocampal interactions in memory and emotion. *Frontiers in Systems Neuroscience*, 9(170), 1-8.  
doi:10.3389/fnsys.2015.00170
- Jones, D. K., & Cercignani, M. (2010). Twenty-five pitfalls in the analysis of diffusion MRI data. *NMR in Biomedicine*, 23(7), 803-820. doi:10.1002/nbm.1543
- Jones, D. K., Knösche, T. R., & Turner, R. (2013). White matter integrity, fiber count, and other fallacies: the do's and don'ts of diffusion MRI. *NeuroImage*, 73, 239-254. doi:10.1016/j.neuroimage.2012.06.081
- Komorowski, R. W., Garcia, C. G., Wilson, A., Hattori, S., Howard, M. W., & Eichenbaum, H. (2013). Ventral hippocampal neurons are shaped by experience to represent behaviorally relevant contexts. *Journal of Neuroscience*, 33(18), 8079-8087. doi:10.1523/JNEUROSCI.5458-12.2013
- Kosslyn, S. M., & Van Kleeck, M. (1990). Broken brains and normal minds: why Humpty-Dumpty needs a skeleton. In E. Schwartz (Ed.), *Computational neuroscience* (pp. 390-402). Cambridge, MA: MIT Press.
- Kurczek, J., Wechsler, E., Ahuja, S., Jensen, U., Cohen, N. J., Tranel, D., & Duff, M. (2015). Differential contributions of hippocampus and medial prefrontal cortex to self-projection and self-referential processing. *Neuropsychologia*, 73, 116-126. doi:10.1016/j.neuropsychologia.2015.05.002
- Leemans, A., & Jones, D. K. (2009). The B-matrix must be rotated when correcting for subject motion in DTI data. *Magnetic Resonance in Medicine*, 61(6), 1336-1349. doi:10.1002/mrm.21890
- Levine, B., Svoboda, E., Hay, J. F., Winocur, G., & Moscovitch, M. (2002). Aging and autobiographical memory: dissociating episodic from semantic retrieval. *Psychology and Aging*, 17(4), 677-689. doi:10.1037/0882-7974.17.4.677
- Manns, J. R., Howard, M. W., & Eichenbaum, H. (2007). Gradual changes in hippocampal activity support remembering the order of events. *Neuron*, 56(3), 530-540. doi:10.1016/j.neuron.2007.08.017
- McCormick, C., Ciaramelli, E., De Luca, F., & Maguire, E. A. (2018). Comparing and contrasting the cognitive effects of hippocampal and ventromedial prefrontal cortex damage: a review of human lesion studies. *Neuroscience*, 374, 295–318. doi:10.1016/j.neuroscience.2017.07.066
- McCormick, C., St-Laurent, M., Ty, A., Valiante, T. A., & McAndrews, M. P. (2015). Functional and effective hippocampal–neocortical connectivity during

construction and elaboration of autobiographical memory retrieval. *Cerebral Cortex*, 25(5), 1297-1305. doi:10.1093/cercor/bht324

Metzler-Baddeley, C., Jones, D. K., Belaroussi, B., Aggleton, J. P., & O'Sullivan, M. J. (2011). Frontotemporal connections in episodic memory and aging: a diffusion MRI tractography study. *Journal of Neuroscience*, 31(37), 13236-13245. doi:10.1523/JNEUROSCI.2317-11.2011

Murray, E. A., Wise, S. P., & Graham, K. S. (2017). *The evolution of memory systems: ancestors, anatomy, and adaptations*. Oxford, UK: Oxford University Press.

Nielson, D. M., Smith, T. A., Sreekumar, V., Dennis, S., & Sederberg, P. B. (2015). Human hippocampus represents space and time during retrieval of real-world memories. *Proceedings of the National Academy of Sciences*, 112(35), 11078-11083. doi:10.1073/pnas.1507104112

O'Neill, P.-K., Gordon, J. A., & Sigurdsson, T. (2013). Theta oscillations in the medial prefrontal cortex are modulated by spatial working memory and synchronize with the hippocampus through its ventral subregion. *Journal of Neuroscience*, 33(35), 14211-14224. doi:10.1523/JNEUROSCI.2378-13.2013

Palombo, D. J., Bacopulos, A., Amaral, R. S., Olsen, R. K., Todd, R. M., Anderson, A. K., & Levine, B. (2018). Episodic autobiographical memory is associated with variation in the size of hippocampal subregions. *Hippocampus*, 28(2), 69-75. doi:10.1002/hipo.22818

Palombo, D. J., Sheldon, S., & Levine, B. (2018). Individual differences in autobiographical memory. *Trends in Cognitive Sciences*, 22(7), 583-597. doi:10.1016/j.tics.2018.04.007

Pasternak, O., Maier-Hein, K., Baumgartner, C., Shenton, M. E., Rathi, Y., & Westin, C.-F. (2014). The estimation of free-water corrected diffusion tensors. In C. F. Westin, A. Vilanova, & B. Burgeth (Eds.), *Visualization and processing of tensors and higher order descriptors for multi-valued data* (pp. 249-270). Berlin, Heidelberg: Springer.

Pasternak, O., Sochen, N., Gur, Y., Intrator, N., & Assaf, Y. (2009). Free water elimination and mapping from diffusion MRI. *Magnetic Resonance in Medicine*, 62(3), 717-730. doi:10.1002/mrm.22055

- Patenaude, B., Smith, S. M., Kennedy, D. N., & Jenkinson, M. (2011). A Bayesian model of shape and appearance for subcortical brain segmentation. *NeuroImage*, 56(3), 907-922. doi:10.1016/j.neuroimage.2011.02.046
- Pierpaoli, C., Jezzard, P., Basser, P. J., Barnett, A., & Di Chiro, G. (1996). Diffusion tensor MR imaging of the human brain. *Radiology*, 201(3), 637-648. doi:10.1148/radiology.201.3.8939209
- Place, R., Farovik, A., Brockmann, M., & Eichenbaum, H. (2016). Bidirectional prefrontal-hippocampal interactions support context-guided memory. *Nature Neuroscience*, 19(8), 992-996. doi:10.1038/nn.4327
- Poletti, C. E., & Creswell, G. (1977). Fornix system efferent projections in the squirrel monkey: an experimental degeneration study. *Journal of Comparative Neurology*, 175(1), 101-127. doi:10.1002/cne.901750107
- Poppenk, J., & Moscovitch, M. (2011). A hippocampal marker of recollection memory ability among healthy young adults: contributions of posterior and anterior segments. *Neuron*, 72(6), 931-937. doi:10.1016/j.neuron.2011.10.014
- Powell, T., Guillery, R., & Cowan, W. (1957). A quantitative study of the fornixmamillo-thalamic system. *Journal of Anatomy*, 91(4), 419-437.
- Preston, A. R., & Eichenbaum, H. (2013). Interplay of hippocampus and prefrontal cortex in memory. *Current Biology*, 23(17), R764-R773. doi:10.1016/j.cub.2013.05.041
- Race, E., Keane, M. M., & Verfaellie, M. (2011). Medial temporal lobe damage causes deficits in episodic memory and episodic future thinking not attributable to deficits in narrative construction. *Journal of Neuroscience*, 31(28), 10262-10269. doi:10.1523/JNEUROSCI.1145-11.2011
- Raichle, M. E. (2015). The brain's default mode network. *Annual Review of Neuroscience*, 38, 433-447. doi:10.1146/annurev-neuro-071013-014030
- Robin, J. (2018). Spatial scaffold effects in event memory and imagination. *Wiley Interdisciplinary Reviews: Cognitive Science*, 9(e1462), 1-15. doi:10.1002/wcs.1462
- Robin, J., & Moscovitch, M. (2017). Details, gist and schema: hippocampal–neocortical interactions underlying recent and remote episodic and spatial memory. *Current Opinion in Behavioral Sciences*, 17, 114-123. doi:10.1016/j.cobeha.2017.07.016



- 794 Saunders, R. C., & Aggleton, J. P. (2007). Origin and topography of fibers  
795 contributing to the fornix in macaque monkeys. *Hippocampus*, 17(5), 396-411.  
796 doi:10.1002/hipo.20276
- 797 Schacter, D. L., Addis, D. R., Hassabis, D., Martin, V. C., Spreng, R. N., & Szpunar,  
798 K. K. (2012). The future of memory: remembering, imagining, and the brain.  
799 *Neuron*, 76(4), 677-694. doi:10.1016/j.neuron.2012.11.001
- 800 Schacter, D. L., Benoit, R. G., & Szpunar, K. K. (2017). Episodic future thinking:  
801 mechanisms and functions. *Current Opinion in Behavioral Sciences*, 17, 41-  
802 50. doi:10.1016/j.cobeha.2017.06.002
- 803 Sellke, T., Bayarri, M., & Berger, J. O. (2001). Calibration of p values for testing  
804 precise null hypotheses. *The American Statistician*, 55(1), 62-71.  
805 doi:10.1198/000313001300339950
- 806 Sheldon, S., & Levine, B. (2016). The role of the hippocampus in memory and  
807 mental construction. *Annals of the New York Academy of Sciences*, 1369(1),  
808 76-92. doi:10.1111/nyas.13006
- 809 Squire, L. R., van der Horst, A. S., McDuff, S. G., Frascino, J. C., Hopkins, R. O., &  
810 Mauldin, K. N. (2010). Role of the hippocampus in remembering the past and  
811 imagining the future. *Proceedings of the National Academy of Sciences*,  
812 107(44), 19044-19048. doi:10.1073/pnas.1014391107
- 813 Strange, B. A., Witter, M. P., Lein, E. S., & Moser, E. I. (2014). Functional  
814 organization of the hippocampal longitudinal axis. *Nature Reviews*  
815 *Neuroscience*, 15(10), 655-669. doi:10.1038/nrn3785
- 816 Vann, S. D. (2013). Dismantling the Papez circuit for memory in rats. *Elife*,  
817 2(e00736), 1-21. doi:10.7554/eLife.00736.001
- 818 Verfaellie, M., Wank, A. A., Reid, A. G., Race, E., & Keane, M. M. (2019). Self-  
819 related processing and future thinking: distinct contributions of ventromedial  
820 prefrontal cortex and the medial temporal lobes. *Cortex*, 115, 159-171.  
821 doi:10.1016/j.cortex.2019.01.028
- 822 Yang, X.-F., Bossmann, J., Schiffhauer, B., Jordan, M., & Immordino-Yang, M. H.  
823 (2013). Intrinsic default mode network connectivity predicts spontaneous  
824 verbal descriptions of autobiographical memories during social processing.  
825 *Frontiers in Psychology*, 3(592), 1-10. doi:10.3389/fpsyg.2012.00592

826 Zeidman, P., & Maguire, E. A. (2016). Anterior hippocampus: the anatomy of  
827 perception, imagination and episodic memory. *Nature Reviews Neuroscience*,  
828 17(3), 173-182. doi:10.1038/nrn.2015.24

829 Zhang, Y., Brady, M., & Smith, S. (2001). Segmentation of brain MR images through  
830 a hidden Markov random field model and the expectation-maximization  
831 algorithm. *IEEE Transactions on Medical Imaging*, 20(1), 45-57.  
832 doi:10.1109/42.906424  
833
